# Supplementary material for: Translation Initiation Factor AteIF(iso)4E Is Involved in Selective mRNA Translation in Arabidopsis Thaliana Seedlings
Source: PLOS journal article supplement (doi:10.1371/journal.pone.0031606), 2012-02-20
Supplement: S8 (10.1371/journal.pone.0031606.s008) [file journal.pone.0031606.s008]

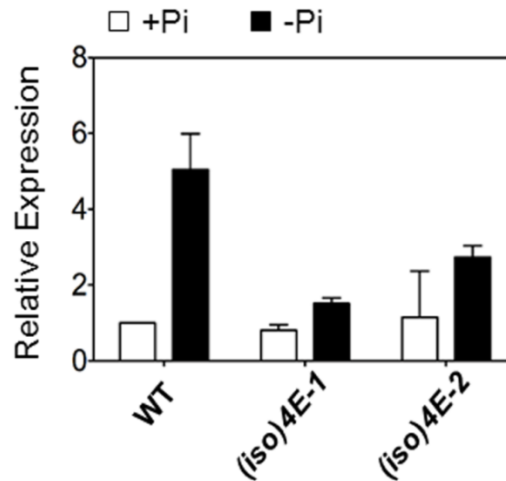

**Supplementary Fig. S8** Increase in *PHO1* transcript level in response to phosphate deficiency. Plants were grown for 15 days in Gamborg's B5 liquid medium and transferred to Hoagland medium containing phosphate (+Pi, white columns) or without phosphate (-Pi, black columns) for 10 days. Total RNA was obtained, DNase treated and assayed by qRT-PCR using as internal control the 18S rRNA gene. Data are shown as the mean of three independent experiments with three replicates each. Bars represent standard error.
